# Supplementary material for: Detection and characterisation of coronaviruses in migratory and non-migratory Australian wild birds
Source: PubMed Central journal article supplement (PMC5899083; doi:10.1038/s41598-018-24407-x), 2018-04-13

## Supplementary information

### Detection and characterisation of coronaviruses in migratory and non-migratory Australian wild birds

Anthony Chamings<sup>1,2</sup>, Tiffanie M. Nelson<sup>1,2</sup>, Jessy Vibin<sup>1,2</sup>, Michelle Wille<sup>3</sup>, Marcel Klaassen<sup>4</sup>  
and Soren Alexandersen<sup>1,2,5 a</sup>

<sup>1</sup>Geelong Centre for Emerging Infectious Diseases, Geelong, Victoria, Australia.

<sup>2</sup>Deakin University, School of Medicine, Geelong, Victoria, Australia.

<sup>3</sup>WHO Collaborating Centre for Reference and Research on Influenza, the Peter Doherty Institute for Infection and Immunity, Melbourne, Victoria, Australia.

<sup>4</sup>Centre for Integrative Ecology, School of Life and Environmental Sciences, Deakin University, Geelong, Victoria, Australia.

<sup>5</sup>Barwon Health, University Hospital Geelong, Geelong, Victoria, Australia.

<sup>a</sup>Corresponding author: [soren.alexandersen@deakin.edu.au](mailto:soren.alexandersen@deakin.edu.au)

Supplementary Table S1. Bird species, location and timing of sampling for coronavirus positive birds. Age of bird was identified as Unknown (U), Juvenile (J) or adult (A)

| Sample ID                                   | Species          | Collection Date | Collection Location | State | Age | 5' UTR PCR Result | Nested PCR Result | Modified PCR Result | Coronavirus Genus | Genbank Accession |
|---------------------------------------------|------------------|-----------------|---------------------|-------|-----|-------------------|-------------------|---------------------|-------------------|-------------------|
| Curlew sandpiper CoV-9763-2016/12/28-WS/VIC | Curlew sandpiper | 28/12/2016      | Werribee South      | VIC   | U   | -                 | -                 | +                   |                   |                   |
| Curlew sandpiper CoV-9768-2016/12/28-WS/VIC | Curlew sandpiper | 28/12/2016      | Werribee South      | VIC   | U   | -                 | +                 | +                   |                   |                   |
| Curlew sandpiper CoV-9776-2016/12/28-WS/VIC | Curlew sandpiper | 28/12/2016      | Werribee South      | VIC   | U   | -                 | +                 | +                   | Gamma             | MG764091          |
| Curlew sandpiper CoV-9819-2016/12/30-WS/VIC | Curlew sandpiper | 30/12/2016      | Werribee South      | VIC   | U   | +                 | -                 | +                   | Gamma             | MG764092          |
| Curlew sandpiper CoV-9820-2016/12/30-WS/VIC | Curlew sandpiper | 30/12/2016      | Werribee South      | VIC   | U   | -                 | +                 | +                   |                   |                   |
| Curlew sandpiper CoV-9821-2016/12/30-WS/VIC | Curlew sandpiper | 30/12/2016      | Werribee South      | VIC   | U   | -                 | -                 | +                   |                   |                   |
| Curlew sandpiper CoV-9822-2016/12/30-WS/VIC | Curlew sandpiper | 30/12/2016      | Werribee South      | VIC   | U   | -                 | +                 | -                   | Gamma             | MG764093          |
| Curlew sandpiper CoV-9825-2016/12/30-WS/VIC | Curlew sandpiper | 30/12/2016      | Werribee South      | VIC   | U   | -                 | -                 | +                   | Delta             | MG764094          |
| Grey teal CoV-10002-2016/6/11-PV/VIC        | Grey teal        | 11/06/2016      | Paynesville         | VIC   | U   | -                 | +                 | -                   | Gamma             | MG764095          |
| Grey teal CoV-10178-2016/6/13-CR/VIC        | Grey teal        | 13/06/2016      | Carlisle river      | VIC   | A   | +                 | +                 | +                   | Gamma             | MG764096          |
| Grey teal CoV-10181-2016/6/13-CR/VIC        | Grey teal        | 13/06/2016      | Carlisle river      | VIC   | A   | -                 | +                 | +                   | Gamma             | MG764097          |
| Grey teal CoV-10214-2016/6/13-CR/VIC        | Grey teal        | 13/06/2016      | Carlisle river      | VIC   | A   | +                 | +                 | +                   | Gamma             | MG764098          |
| Grey teal CoV-10215-2016/6/13-CR/VIC        | Grey teal        | 13/06/2016      | Carlisle river      | VIC   | A   | +                 | +                 | +                   |                   |                   |
| Grey teal CoV-10226-2016/10/28-MM/NSW       | Grey teal        | 28/10/2016      | Moulamein           | NSW   | A   | +                 | +                 | +                   |                   |                   |
| Grey teal CoV-10227-2016/10/28-MM/NSW       | Grey teal        | 28/10/2016      | Moulamein           | NSW   | A   | +                 | +                 | +                   |                   |                   |
| Grey teal CoV-10228-2016/10/28-MM/NSW       | Grey teal        | 28/10/2016      | Moulamein           | NSW   | A   | -                 | +                 | +                   | Gamma             | MG764099          |
| Grey teal CoV-10229-2016/10/28-MM/NSW       | Grey teal        | 28/10/2016      | Moulamein           | NSW   | A   | +                 | +                 | +                   | Gamma             | MG764100          |
| Grey teal CoV-10230-2016/10/28-MM/NSW       | Grey teal        | 28/10/2016      | Moulamein           | NSW   | A   | +                 | +                 | +                   | Gamma             | MG764101          |
| Grey teal CoV-10234-2016/10/28-MM/NSW       | Grey teal        | 28/10/2016      | Moulamein           | NSW   | A   | +                 | +                 | +                   | Gamma             | MG764102          |
| Grey teal CoV-10235-2016/10/28-MM/NSW       | Grey teal        | 28/10/2016      | Moulamein           | NSW   | A   | -                 | +                 | -                   | Gamma             | MG764103          |
| Grey teal CoV-10237-2016/10/28-MM/NSW       | Grey teal        | 28/10/2016      | Moulamein           | NSW   | A   | -                 | +                 | +                   |                   |                   |
| Grey teal CoV-10238-2016/10/28-MM/NSW       | Grey teal        | 28/10/2016      | Moulamein           | NSW   | A   | -                 | +                 | +                   |                   |                   |
| Grey teal CoV-10239-2016/10/28-MM/NSW       | Grey teal        | 28/10/2016      | Moulamein           | NSW   | A   | -                 | +                 | +                   |                   |                   |
| Grey teal CoV-10240-2016/10/28-MM/NSW       | Grey teal        | 28/10/2016      | Moulamein           | NSW   | A   | -                 | +                 | +                   |                   |                   |
| Grey teal CoV-10241-2016/10/29-MM/NSW       | Grey teal        | 29/10/2016      | Moulamein           | NSW   | U   | -                 | +                 | +                   |                   |                   |

|                                                |                    |            |                   |     |   |   |   |   |                 |                       |
|------------------------------------------------|--------------------|------------|-------------------|-----|---|---|---|---|-----------------|-----------------------|
| Grey teal CoV-10243-2016/10/29-MM/NSW          | Grey teal          | 29/10/2016 | Moulamein         | NSW | U | - | + | - | Gamma           | MG764104              |
| Grey teal CoV-10250-2016/10/29-MM/NSW          | Grey teal          | 29/10/2016 | Moulamein         | NSW | U | + | + | + | Gamma           | MG764105              |
| Pacific black duck CoV-10180-2016/6/13-CR/VIC  | Pacific black duck | 13/06/2016 | Carlisle river    | VIC | A | - | + | + | Gamma           | MG764106              |
| Pacific black duck CoV-10196-2016/6/13-CR/VIC  | Pacific black duck | 13/06/2016 | Carlisle river    | VIC | A | + | + | + | Gamma           | MG764107              |
| Pacific black duck CoV-10221-2016/6/13-CR/VIC  | Pacific black duck | 13/06/2016 | Carlisle river    | VIC | A | + | + | + | Gamma           | MG764108              |
| Pacific black duck CoV-8907-2016/6/7-LC/VIC    | Pacific black duck | 7/06/2016  | Lake Connewarre   | VIC | A | - | - | + | Gamma           | MG764109              |
| Pacific black duck CoV-8916-2016/6/7-LC/VIC    | Pacific black duck | 7/06/2016  | Lake Connewarre   | VIC | A | - | + | + |                 |                       |
| Pacific black duck CoV-9707-2016/12/21-LC/VIC  | Pacific black duck | 21/12/2016 | Lake Connewarre   | VIC | A | - | + | + |                 |                       |
| Pacific black duck CoV-9709-2016/12/21-LC/VIC  | Pacific black duck | 21/12/2016 | Lake Connewarre   | VIC | J | - | + | + |                 |                       |
| Pacific black duck CoV-9710-2016/12/21-LC/VIC  | Pacific black duck | 21/12/2016 | Lake Connewarre   | VIC | J | + | + | + | Gamma           | MG764110              |
| Pacific black duck CoV-9711-2016/12/21-LC/VIC  | Pacific black duck | 21/12/2016 | Lake Connewarre   | VIC | J | + | + | + | Gamma           | MG764111              |
| Pacific black duck CoV-9712-2016/12/21-LC/VIC  | Pacific black duck | 21/12/2016 | Lake Connewarre   | VIC | J | - | + | + |                 |                       |
| Pacific black duck CoV-9713-2016/12/21-LC/VIC  | Pacific black duck | 21/12/2016 | Lake Connewarre   | VIC | J | + | + | + |                 |                       |
| Pacific black duck CoV-9714-2016/12/21-LC/VIC  | Pacific black duck | 21/12/2016 | Lake Connewarre   | VIC | A | - | + | + |                 |                       |
| Pacific black duck CoV-9715-2016/12/22-LC/VIC  | Pacific black duck | 22/12/2016 | Lake Connewarre   | VIC | A | - | + | + |                 |                       |
| Pacific black duck CoV-9718-2016/12/22-LC/VIC  | Pacific black duck | 22/12/2016 | Lake Connewarre   | VIC | J | - | - | + | Gamma           | MG764112              |
| Pacific black duck CoV-9719-2016/12/22-LC/VIC  | Pacific black duck | 22/12/2016 | Lake Connewarre   | VIC | A | - | - | + | Gamma           | MG764113              |
| Pacific black duck CoV-9720-2016/12/22-LC/VIC  | Pacific black duck | 22/12/2016 | Lake Connewarre   | VIC | A | - | + | + |                 |                       |
| Pacific black duck CoV-9721-2016/12/22-LC/VIC  | Pacific black duck | 22/12/2016 | Lake Connewarre   | VIC | A | - | + | + | Gamma           | MG764114              |
| Pacific Black Duck CoV-G0001-2016/12/21-LC/VIC | Pacific Black Duck | 21/12/2016 | Lake Connewarre   | VIC | J | + | + | + | Gamma,<br>Delta | MG764115,<br>MG764116 |
| Pied heron CoV-9518-2016/4/30-HD/NT            | Pied heron         | 30/04/2016 | Humpty Doo        | NT  | A | - | + | + | Delta           | MG764117              |
| Pied heron CoV-9521-2016/5/1-HD/NT             | Pied heron         | 1/05/2016  | Humpty Doo        | NT  | A | - | + | - | Delta           | MG764118              |
| Pied heron CoV-9522-2016/5/1-HD/NT             | Pied heron         | 1/05/2016  | Humpty Doo        | NT  | J | - | + | - | Delta           | MG764119              |
| Pied heron CoV-9523-2016/5/1-HD/NT             | Pied heron         | 1/05/2016  | Humpty Doo        | NT  | J | - | + | + | Delta           | MG764120              |
| Pied heron CoV-9524-2016/5/1-HD/NT             | Pied heron         | 1/05/2016  | Humpty Doo        | NT  | J | - | + | + | Delta           | MG764121              |
| Radjah shelduck CoV-9515-2016/4/28-HD/NT       | Radjah shelduck    | 28/04/2016 | Humpty Doo        | NT  | A | + | + | + | Gamma           | MG764122              |
| Red-necked stint CoV-10034-2017/1/7-YC/VIC     | Red-necked stint   | 7/01/2017  | Yallock Creek     | VIC | U | - | + | - |                 |                       |
| Red-necked stint CoV-10402-2017/1/21-BI/VIC    | Red-necked stint   | 21/01/2017 | Barrallier Island | VIC | U | - | + | + | Gamma           | MG764123              |
| Red-necked stint CoV-10412-2017/1/21-BI/VIC    | Red-necked stint   | 21/01/2017 | Barrallier Island | VIC | U | + | - | - |                 |                       |

|                                             |                  |            |                   |     |   |   |   |   |       |          |
|---------------------------------------------|------------------|------------|-------------------|-----|---|---|---|---|-------|----------|
| Red-necked stint CoV-10415-2017/1/21-BI/VIC | Red-necked stint | 21/01/2017 | Barrallier Island | VIC | U | + | + | + | Gamma | MG764124 |
| Red-necked stint CoV-10442-2017/1/21-BI/VIC | Red-necked stint | 21/01/2017 | Barrallier Island | VIC | U | + | - | - |       |          |
| Red-necked stint CoV-10443-2017/1/21-BI/VIC | Red-necked stint | 21/01/2017 | Barrallier Island | VIC | U | + | - | - |       |          |
| Red-necked stint CoV-10452-2017/1/21-BI/VIC | Red-necked stint | 21/01/2017 | Barrallier Island | VIC | U | + | - | - |       |          |
| Red-necked stint CoV-10455-2017/1/21-BI/VIC | Red-necked stint | 21/01/2017 | Barrallier Island | VIC | U | - | - | + |       |          |
| Red-necked stint CoV-10461-2017/1/21-BI/VIC | Red-necked stint | 21/01/2017 | Barrallier Island | VIC | U | + | - | - |       |          |
| Red-necked stint CoV-10467-2017/1/21-BI/VIC | Red-necked stint | 21/01/2017 | Barrallier Island | VIC | U | - | - | + | Delta | MG764125 |
| Red-necked stint CoV-10479-2017/1/21-BI/VIC | Red-necked stint | 21/01/2017 | Barrallier Island | VIC | U | - | - | + |       |          |
| Red-necked stint CoV-10485-2017/1/21-BI/VIC | Red-necked stint | 21/01/2017 | Barrallier Island | VIC | U | + | - | - |       |          |
| Red-necked stint CoV-10490-2017/1/21-BI/VIC | Red-necked stint | 21/01/2017 | Barrallier Island | VIC | U | + | - | - |       |          |
| Red-necked stint CoV-10496-2017/1/21-BI/VIC | Red-necked stint | 21/01/2017 | Barrallier Island | VIC | U | + | - | - |       |          |
| Red-necked stint CoV-10504-2017/1/21-BI/VIC | Red-necked stint | 21/01/2017 | Barrallier Island | VIC | U | + | - | - |       |          |
| Red-necked stint CoV-10517-2017/1/21-BI/VIC | Red-necked stint | 21/01/2017 | Barrallier Island | VIC | U | + | - | - |       |          |
| Red-necked stint CoV-10519-2017/1/21-BI/VIC | Red-necked stint | 21/01/2017 | Barrallier Island | VIC | U | + | - | - |       |          |
| Red-necked stint CoV-10522-2017/1/21-BI/VIC | Red-necked stint | 21/01/2017 | Barrallier Island | VIC | U | + | - | - |       |          |
| Red-necked stint CoV-10523-2017/1/21-BI/VIC | Red-necked stint | 21/01/2017 | Barrallier Island | VIC | U | + | - | - |       |          |
| Red-necked stint CoV-10524-2017/1/21-BI/VIC | Red-necked stint | 21/01/2017 | Barrallier Island | VIC | U | + | - | - |       |          |
| Red-necked stint CoV-10533-2017/1/21-BI/VIC | Red-necked stint | 21/01/2017 | Barrallier Island | VIC | U | + | - | - |       |          |
| Red-necked stint CoV-10540-2017/1/21-BI/VIC | Red-necked stint | 21/01/2017 | Barrallier Island | VIC | U | + | + | + |       |          |
| Red-necked stint CoV-10554-2017/1/21-BI/VIC | Red-necked stint | 21/01/2017 | Barrallier Island | VIC | U | + | - | - |       |          |
| Red-necked stint CoV-10563-2017/1/21-BI/VIC | Red-necked stint | 21/01/2017 | Barrallier Island | VIC | U | + | - | - |       |          |
| Red-necked stint CoV-9060-2016/12/30-WS/VIC | Red-necked stint | 30/12/2016 | Werribee South    | VIC | U | - | - | + |       |          |
| Red-necked stint CoV-9068-2016/12/30-WS/VIC | Red-necked stint | 30/12/2016 | Werribee South    | VIC | U | - | - | + | Gamma | MG764126 |
| Red-necked stint CoV-9074-2016/12/30-WS/VIC | Red-necked stint | 30/12/2016 | Werribee South    | VIC | U | - | + | + |       |          |
| Red-necked stint CoV-9075-2016/12/30-WS/VIC | Red-necked stint | 30/12/2016 | Werribee South    | VIC | U | + | + | - |       |          |
| Red-necked stint CoV-9729-2016/12/28-WS/VIC | Red-necked stint | 28/12/2016 | Werribee South    | VIC | U | - | + | - | Gamma | MG764127 |
| Red-necked stint CoV-9736-2016/12/28-WS/VIC | Red-necked stint | 28/12/2016 | Werribee South    | VIC | U | - | - | + |       |          |
| Red-necked stint CoV-9738-2016/12/28-WS/VIC | Red-necked stint | 28/12/2016 | Werribee South    | VIC | U | - | + | + | Gamma | MG764128 |
| Red-necked stint CoV-9745-2016/12/28-WS/VIC | Red-necked stint | 28/12/2016 | Werribee South    | VIC | U | - | + | + |       |          |
| Red-necked stint CoV-9752-2016/12/28-WS/VIC | Red-necked stint | 28/12/2016 | Werribee South    | VIC | U | - | + | + | Gamma | MG764129 |

|                                             |                  |            |                |     |   |   |   |   |       |          |
|---------------------------------------------|------------------|------------|----------------|-----|---|---|---|---|-------|----------|
| Red-necked stint CoV-9772-2016/12/28-WS/VIC | Red-necked stint | 28/12/2016 | Werribee South | VIC | U | - | + | + | Gamma | MG764130 |
| Red-necked stint CoV-9780-2016/12/29-WS/VIC | Red-necked stint | 29/12/2016 | Werribee South | VIC | U | - | + | - | Gamma | MG764131 |
| Red-necked stint CoV-9786-2016/12/29-WS/VIC | Red-necked stint | 29/12/2016 | Werribee South | VIC | U | - | + | + | Gamma | MG764132 |
| Red-necked stint CoV-9794-2016/12/29-WS/VIC | Red-necked stint | 29/12/2016 | Werribee South | VIC | U | - | + | + |       |          |
| Red-necked stint CoV-9795-2016/12/29-WS/VIC | Red-necked stint | 29/12/2016 | Werribee South | VIC | U | - | - | + | Delta | MG764133 |
| Red-necked stint CoV-9809-2016/12/29-WS/VIC | Red-necked stint | 29/12/2016 | Werribee South | VIC | U | - | + | + |       |          |
| Red-necked stint CoV-9810-2016/12/29-WS/VIC | Red-necked stint | 29/12/2016 | Werribee South | VIC | U | - | + | + |       |          |
| Red-necked stint CoV-9811-2016/12/29-WS/VIC | Red-necked stint | 29/12/2016 | Werribee South | VIC | U | - | + | + |       |          |
| Red-necked stint CoV-9967-2017/1/7-YC/VIC   | Red-necked stint | 7/01/2017  | Yallock Creek  | VIC | U | + | - | - |       |          |
| Ruddy turnstone CoV-9549-2016/11/18-BB/TAS  | Ruddy turnstone  | 18/11/2016 | Burges Bay     | TAS | U | + | + | + | Gamma | MG764134 |
| Ruddy turnstone CoV-9550-2016/11/18-BB/TAS  | Ruddy turnstone  | 18/11/2016 | Burges Bay     | TAS | U | + | + | + | Gamma | MG764135 |
| Ruddy turnstone CoV-9551-2016/11/18-BB/TAS  | Ruddy turnstone  | 18/11/2016 | Burges Bay     | TAS | U | - | - | + |       |          |
| Ruddy turnstone CoV-9560-2016/11/18-BB/TAS  | Ruddy turnstone  | 18/11/2016 | Burges Bay     | TAS | U | - | + | + | Delta | MG764136 |
| Ruddy turnstone CoV-9564-2016/11/18-BB/TAS  | Ruddy turnstone  | 18/11/2016 | Burges Bay     | TAS | U | + | + | + | Gamma | MG764137 |
| Ruddy turnstone CoV-9566-2016/11/18-BB/TAS  | Ruddy turnstone  | 18/11/2016 | Burges Bay     | TAS | U | + | + | + | Gamma | MG764138 |
| Ruddy turnstone CoV-9567-2016/11/18-BB/TAS  | Ruddy turnstone  | 18/11/2016 | Burges Bay     | TAS | U | - | + | + | Delta | MH090081 |
| Ruddy turnstone CoV-9574-2016/11/18-BB/TAS  | Ruddy turnstone  | 18/11/2016 | Burges Bay     | TAS | U | - | + | - | Delta | MG764139 |
| Ruddy turnstone CoV-9582-2016/11/18-BB/TAS  | Ruddy turnstone  | 18/11/2016 | Burges Bay     | TAS | U | - | + | + |       |          |
| Ruddy turnstone CoV-9583-2016/11/18-BB/TAS  | Ruddy turnstone  | 18/11/2016 | Burges Bay     | TAS | U | - | - | + |       |          |
| Ruddy turnstone CoV-9586-2016/11/18-BB/TAS  | Ruddy turnstone  | 18/11/2016 | Burges Bay     | TAS | U | - | - | + |       |          |
| Ruddy turnstone CoV-9587-2016/11/18-BB/TAS  | Ruddy turnstone  | 18/11/2016 | Burges Bay     | TAS | U | + | + | + | Gamma | MG764140 |
| Ruddy turnstone CoV-9592-2016/11/18-BB/TAS  | Ruddy turnstone  | 18/11/2016 | Burges Bay     | TAS | U | - | + | - | Gamma | MG764141 |
| Ruddy turnstone CoV-9596-2016/11/19-CM/TAS  | Ruddy turnstone  | 19/11/2016 | Central Manuka | TAS | U | + | + | + | Gamma | MG764142 |
| Ruddy turnstone CoV-9597-2016/11/19-CM/TAS  | Ruddy turnstone  | 19/11/2016 | Central Manuka | TAS | U | + | + | + | Gamma | MG764143 |
| Ruddy turnstone CoV-9600-2016/11/19-CM/TAS  | Ruddy turnstone  | 19/11/2016 | Central Manuka | TAS | U | + | - | + | Gamma | MG764144 |
| Ruddy turnstone CoV-9602-2016/11/19-CM/TAS  | Ruddy turnstone  | 19/11/2016 | Central Manuka | TAS | U | + | + | + | Gamma | MG764145 |
| Ruddy turnstone CoV-9604-2016/11/19-CM/TAS  | Ruddy turnstone  | 19/11/2016 | Central Manuka | TAS | U | - | + | + |       |          |
| Ruddy turnstone CoV-9605-2016/11/19-CM/TAS  | Ruddy turnstone  | 19/11/2016 | Central Manuka | TAS | U | - | + | + | Gamma | MH090080 |
| Ruddy turnstone CoV-9610-2016/11/19-CM/TAS  | Ruddy turnstone  | 19/11/2016 | Central Manuka | TAS | U | - | + | + | Delta | MG764146 |
| Ruddy turnstone CoV-9612-2016/11/19-CM/TAS  | Ruddy turnstone  | 19/11/2016 | Central Manuka | TAS | U | + | + | + | Gamma | MG764147 |

|                                            |                 |            |                 |     |   |   |   |             |       |          |
|--------------------------------------------|-----------------|------------|-----------------|-----|---|---|---|-------------|-------|----------|
| Ruddy turnstone CoV-9614-2016/11/19-CM/TAS | Ruddy turnstone | 19/11/2016 | Central Manuka  | TAS | U | - | + | Not Tested* |       |          |
| Ruddy turnstone CoV-9617-2016/11/19-CM/TAS | Ruddy turnstone | 19/11/2016 | Central Manuka  | TAS | U | + | + | +           | Gamma | MG764148 |
| Ruddy turnstone CoV-9619-2016/11/19-CM/TAS | Ruddy turnstone | 19/11/2016 | Central Manuka  | TAS | U | - | + | +           |       |          |
| Ruddy turnstone CoV-9623-2016/11/19-CM/TAS | Ruddy turnstone | 19/11/2016 | Central Manuka  | TAS | U | - | + | +           | Gamma | MG764149 |
| Ruddy turnstone CoV-9624-2016/11/19-CM/TAS | Ruddy turnstone | 19/11/2016 | Central Manuka  | TAS | U | - | + | +           | Gamma | MG764150 |
| Ruddy turnstone CoV-9628-2016/11/22-DW/TAS | Ruddy turnstone | 22/11/2016 | Dripping Wells  | TAS | U | + | + | +           | Gamma | MG764151 |
| Ruddy turnstone CoV-9652-2016/11/22-DW/TAS | Ruddy turnstone | 22/11/2016 | Dripping Wells  | TAS | U | + | + | +           |       |          |
| Ruddy turnstone CoV-9653-2016/11/22-DW/TAS | Ruddy turnstone | 22/11/2016 | Dripping Wells  | TAS | U | + | + | +           |       |          |
| Ruddy turnstone CoV-9656-2016/11/27-NV/SA  | Ruddy turnstone | 27/11/2016 | Nene Valley     | SA  | U | + | + | +           |       |          |
| Ruddy turnstone CoV-9657-2016/11/27-NV/SA  | Ruddy turnstone | 27/11/2016 | Nene Valley     | SA  | U | + | + | +           |       |          |
| Ruddy turnstone CoV-9662-2016/11/27-NV/SA  | Ruddy turnstone | 27/11/2016 | Nene Valley     | SA  | U | - | - | +           | Gamma | MG764152 |
| Ruddy turnstone CoV-9668-2016/11/27-NV/SA  | Ruddy turnstone | 27/11/2016 | Nene Valley     | SA  | U | - | - | +           | Gamma | MG764153 |
| Ruddy turnstone CoV-9671-2016/11/27-NV/SA  | Ruddy turnstone | 27/11/2016 | Nene Valley     | SA  | U | + | + | +           |       |          |
| Ruddy turnstone CoV-9682-2016/11/28-BP/SA  | Ruddy turnstone | 28/11/2016 | Boatswain Point | SA  | U | + | + | +           |       |          |
| Ruddy turnstone CoV-9684-2016/11/28-BP/SA  | Ruddy turnstone | 28/11/2016 | Boatswain Point | SA  | U | + | - | +           |       |          |
| Ruddy turnstone CoV-9685-2016/11/28-BP/SA  | Ruddy turnstone | 28/11/2016 | Boatswain Point | SA  | U | + | + | +           |       |          |
| Ruddy turnstone CoV-9686-2016/11/28-BP/SA  | Ruddy turnstone | 28/11/2016 | Boatswain Point | SA  | U | - | - | +           |       |          |
| Ruddy turnstone CoV-9687-2016/11/28-BP/SA  | Ruddy turnstone | 28/11/2016 | Boatswain Point | SA  | U | + | + | +           |       |          |
| Ruddy turnstone CoV-9690-2016/11/28-BP/SA  | Ruddy turnstone | 28/11/2016 | Boatswain Point | SA  | U | + | + | +           |       |          |
| Ruddy turnstone CoV-9691-2016/11/28-BP/SA  | Ruddy turnstone | 28/11/2016 | Boatswain Point | SA  | U | + | + | +           |       |          |
| Ruddy turnstone CoV-9692-2016/11/28-BP/SA  | Ruddy turnstone | 28/11/2016 | Boatswain Point | SA  | U | + | + | +           |       |          |
| Ruddy turnstone CoV-9693-2016/11/28-BP/SA  | Ruddy turnstone | 28/11/2016 | Boatswain Point | SA  | U | - | + | +           |       |          |
| Ruddy turnstone CoV-9694-2016/11/28-BP/SA  | Ruddy turnstone | 28/11/2016 | Boatswain Point | SA  | U | + | + | +           | Gamma | MG764154 |
| Ruddy turnstone CoV-9696-2016/11/28-BP/SA  | Ruddy turnstone | 28/11/2016 | Boatswain Point | SA  | U | + | + | +           | Gamma | MG764155 |
| Ruddy turnstone CoV-9698-2016/11/28-BP/SA  | Ruddy turnstone | 28/11/2016 | Boatswain Point | SA  | U | - | + | +           | Delta | MG764156 |
| Ruddy turnstone CoV-9699-2016/11/28-BP/SA  | Ruddy turnstone | 28/11/2016 | Boatswain Point | SA  | U | + | + | +           |       |          |
| Wood duck CoV-10220-2016/6/13-CR/VIC       | Wood duck       | 13/06/2016 | Carlisle river  | VIC | A | + | - | -           |       |          |

\*Due to insufficient RNA for assay

Supplementary Figure S1. *Maximum likelihood phylogenetic tree of the 277 bp fragment of the polymerase gene of gammacoronaviruses from wild birds including the sequences obtained in this study. Bootstrap confidence of each branch was calculated from 1000 replicates. The region where each sequence was obtained is indicated with colour. Australia (red), Madagascar (teal), China, Hong Kong and Korea (dark blue), Bering Strait region (green), United States of America (light blue) and Sweden (pink). The sampling location and state of each Australian sample is identified with a two letter code and the state: New South Wales (NSW): MM-Moulamein; Northern Territory (NT): HD-Humpty Doo; South Australia (SA): BP-Boatswain Point, NV-Nene Valley; Tasmania (TAS): BB-Borges Bay, King Island, CM-Central Manuka, King Island, DW-Dripping Wells, King Island, Tasmania; Victoria (VIC): BI-Barrallier Island, CR-Carlisle River, LC-Lake Connewarre, PV-Paynesville, WS-Werribee South.*

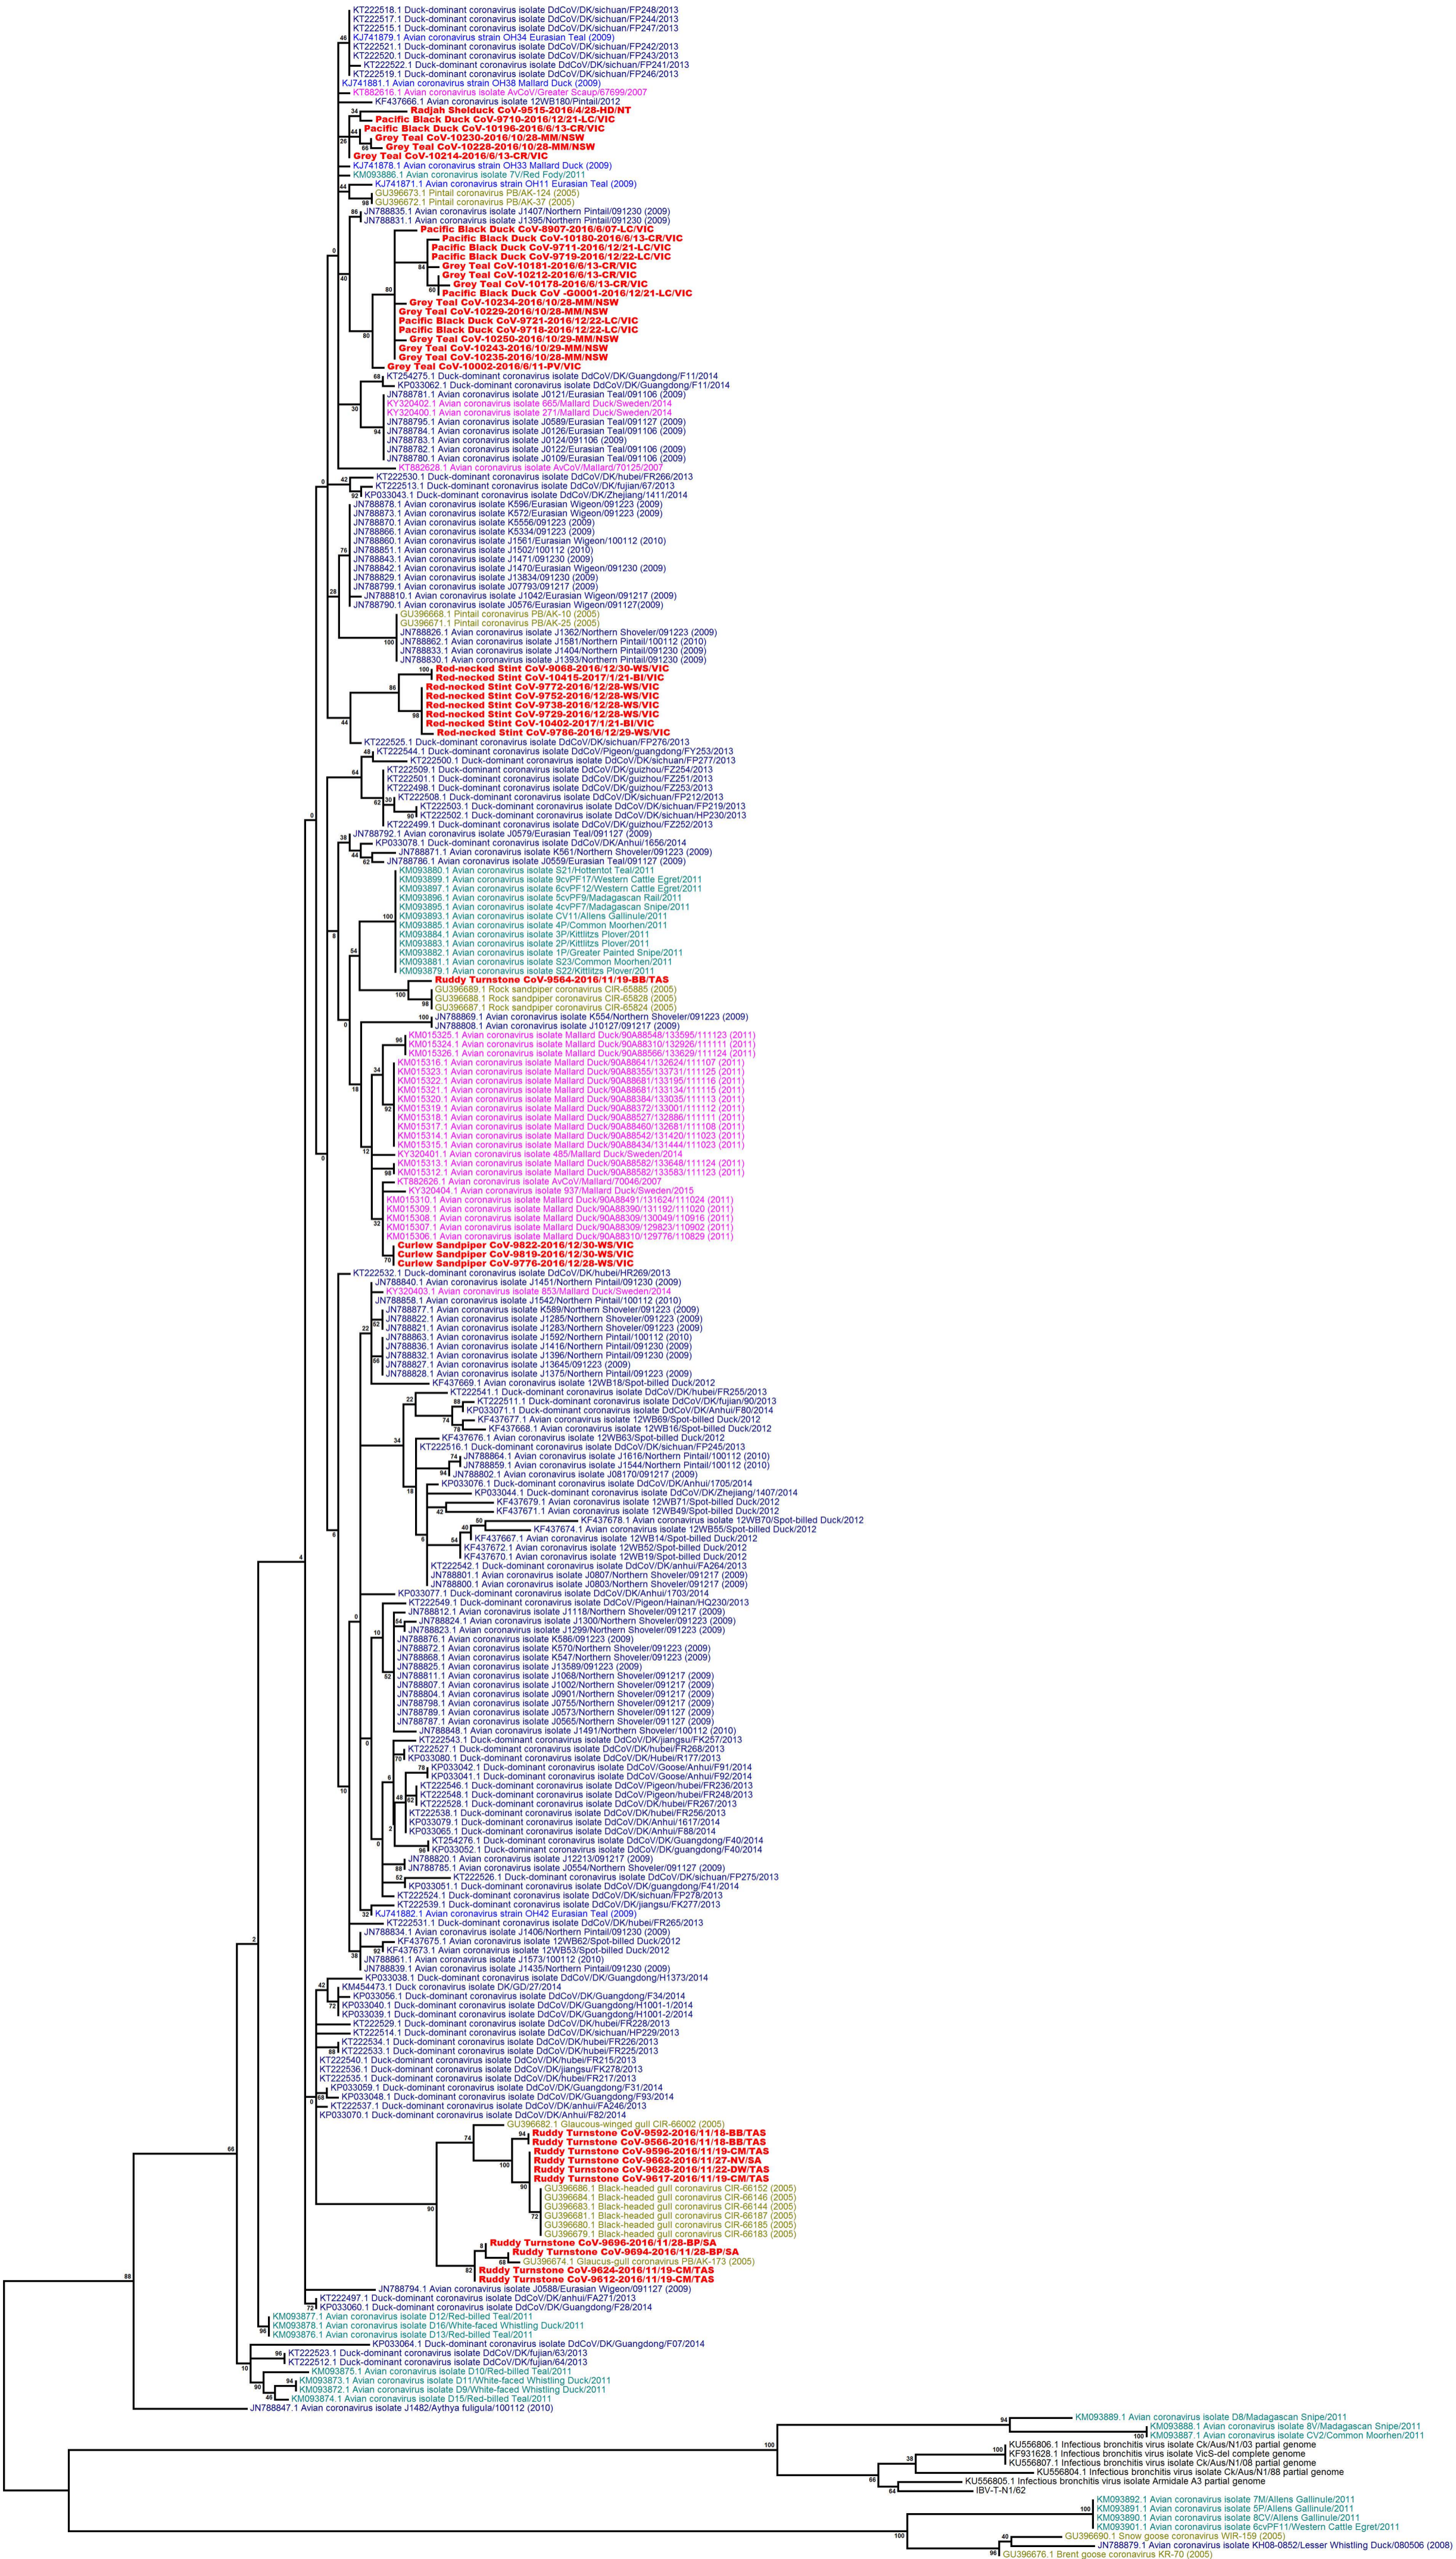



Supplementary Figure S2. *Maximum likelihood phylogenetic tree of the 92 amino acid sequence of the gammacoronaviruses from wild birds. Bootstrap confidence of each branch was calculated from 500 replicates. The region where each sequence was obtained is indicated with colour. Australia (red), Madagascar (teal), China, Hong Kong and Korea (dark blue), Bering Strait region (green), United States of America (light blue) and Sweden (pink). The sampling location and state of each Australian sample is identified with a two letter code and the state: New South Wales (NSW): MM-Moulamein; Northern Territory (NT): HD-Humpty Doo; South Australia (SA): BP-Boatswain Point, NV-Nene Valley; Tasmania (TAS): BB-Borges Bay, King Island, CM-Central Manuka, King Island, DW-Dripping Wells, King Island, Tasmania; Victoria (VIC): BI-Barrallier Island, CR-Carlisle River, LC-Lake Connewarre, PV-Paynesville, WS-Werribee South.*

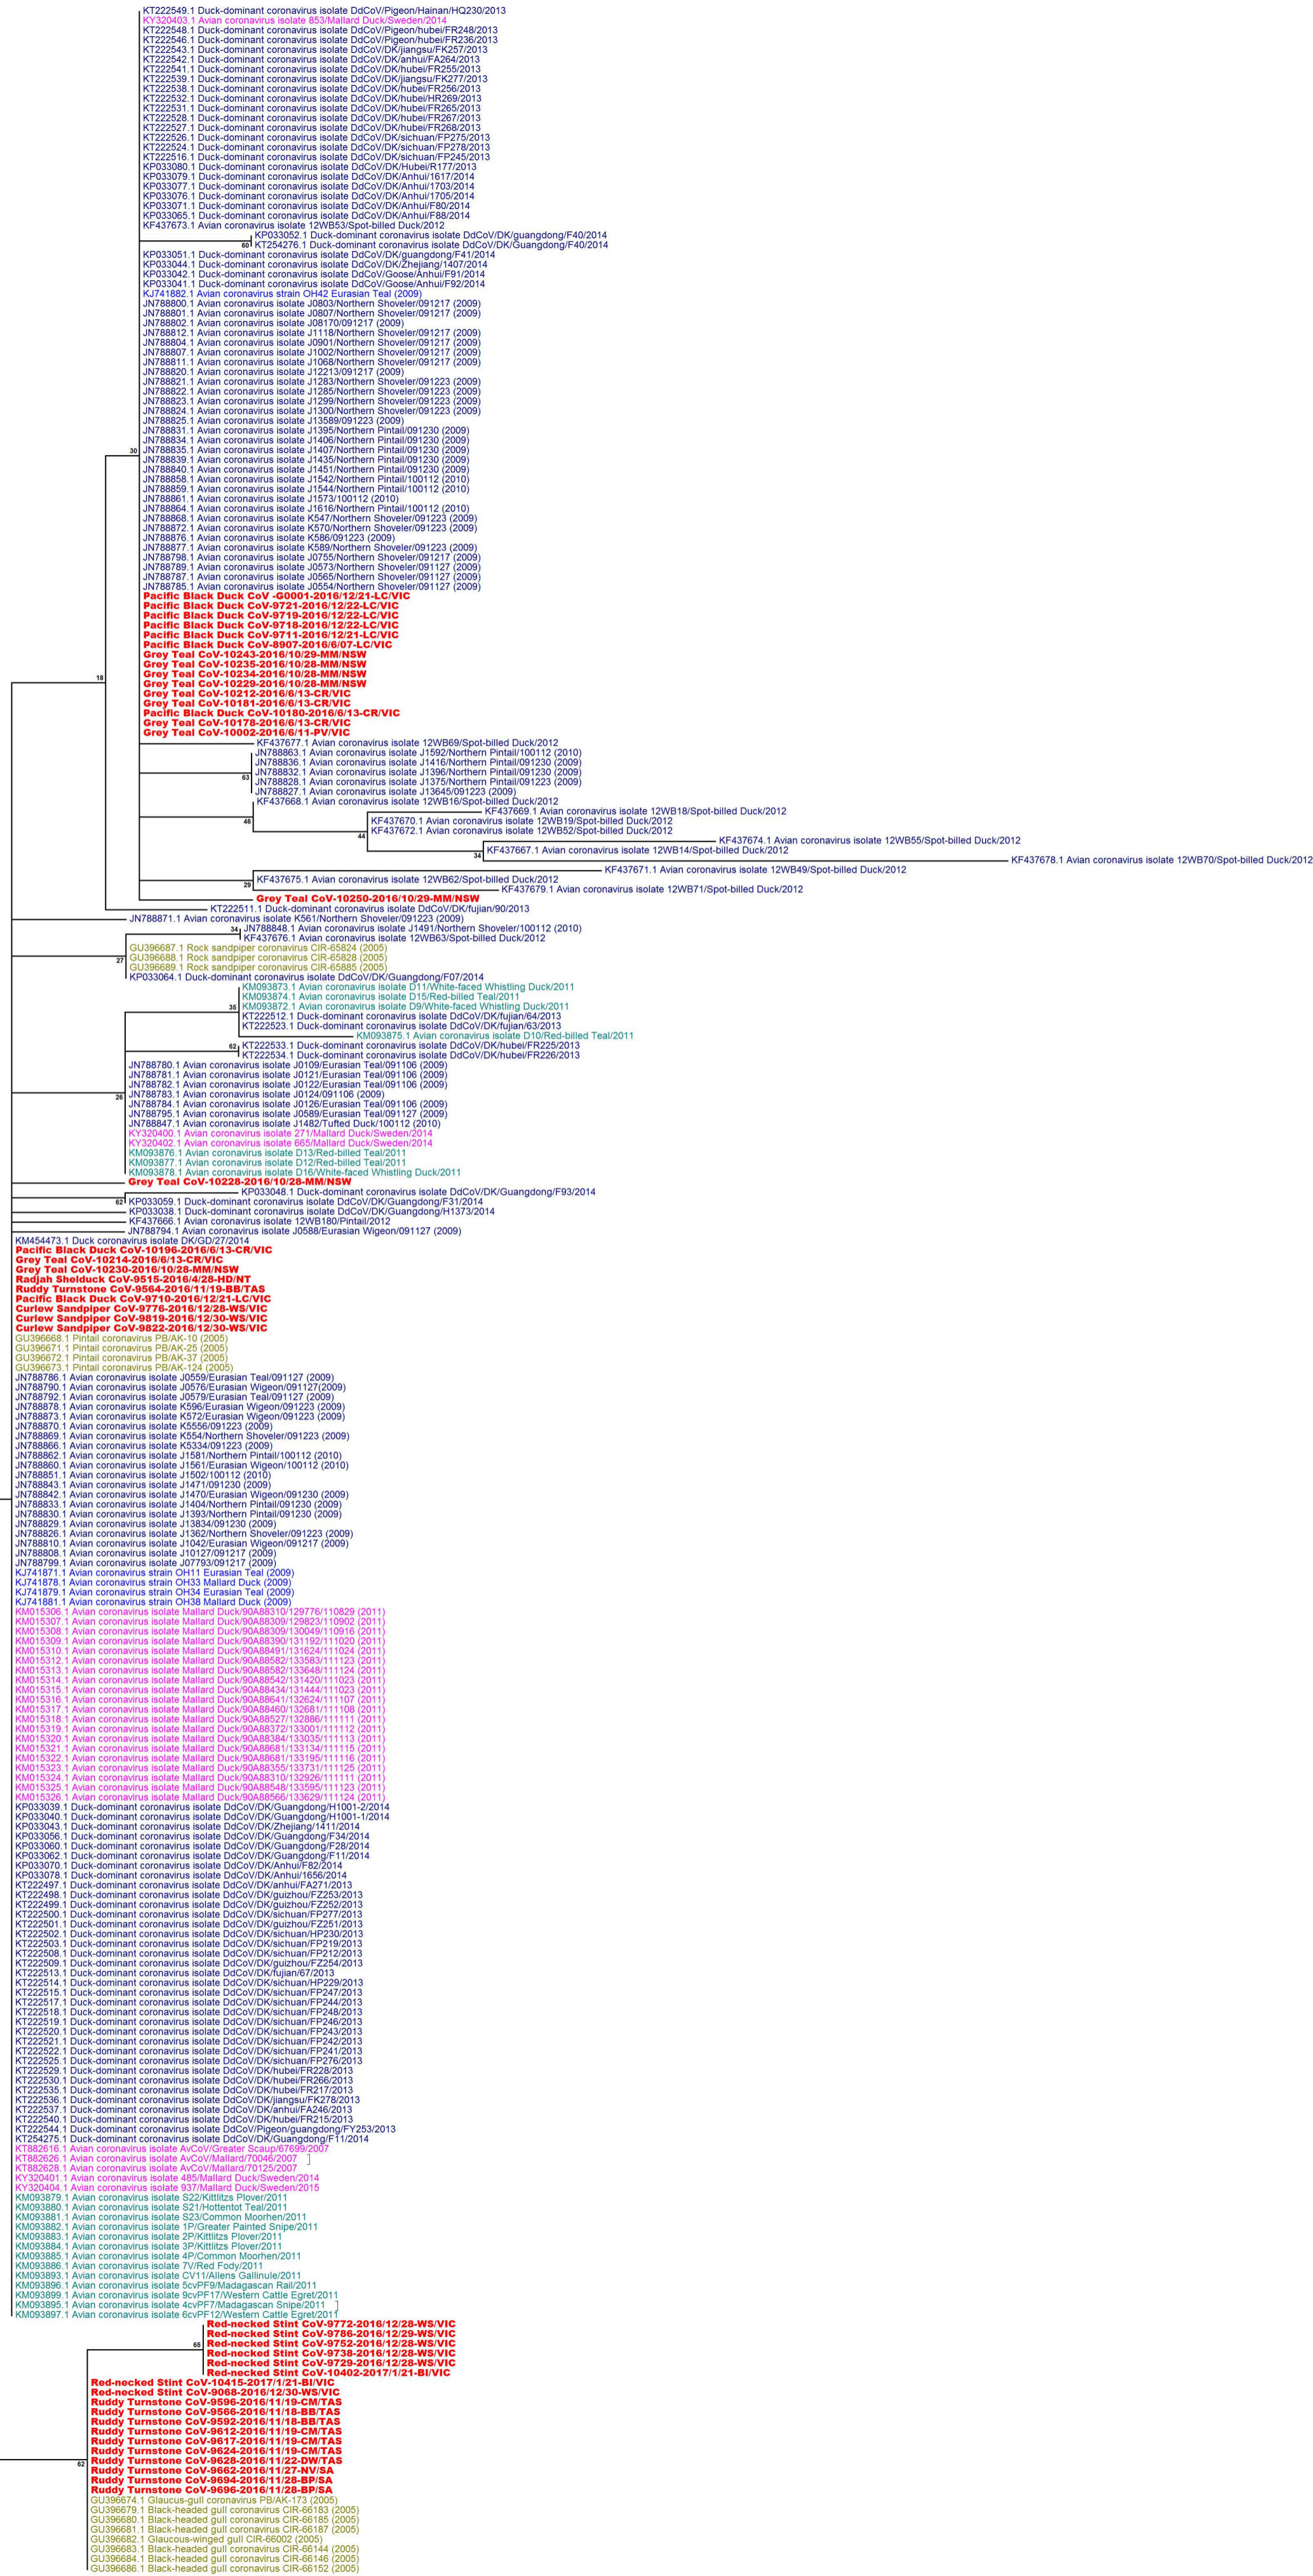

Supplementary Figure S3. *Maximum likelihood phylogenetic tree of the 311 nt fragment of the polymerase gene of deltacoronaviruses from wild birds, including the sequences obtained in this study. Bootstrap confidence of each branch was calculated from 1000 replicates. The sampling location and state of each Australian sample is identified with a two letter code and the state: New South Wales (NSW): MM-Moulamein; Northern Territory (NT): HD-Humpty Doo; South Australia (SA): BP-Boatswain Point, NV-Nene Valley; Tasmania (TAS): BB-Borges Bay, King Island, CM-Central Manuka, King Island, DW-Dripping Wells, King Island, Tasmania; Victoria (VIC): BI-Barrallier Island, CR-Carlisle River, LC-Lake Connewarre, PV-Paynesville, WS-Werribee South.*

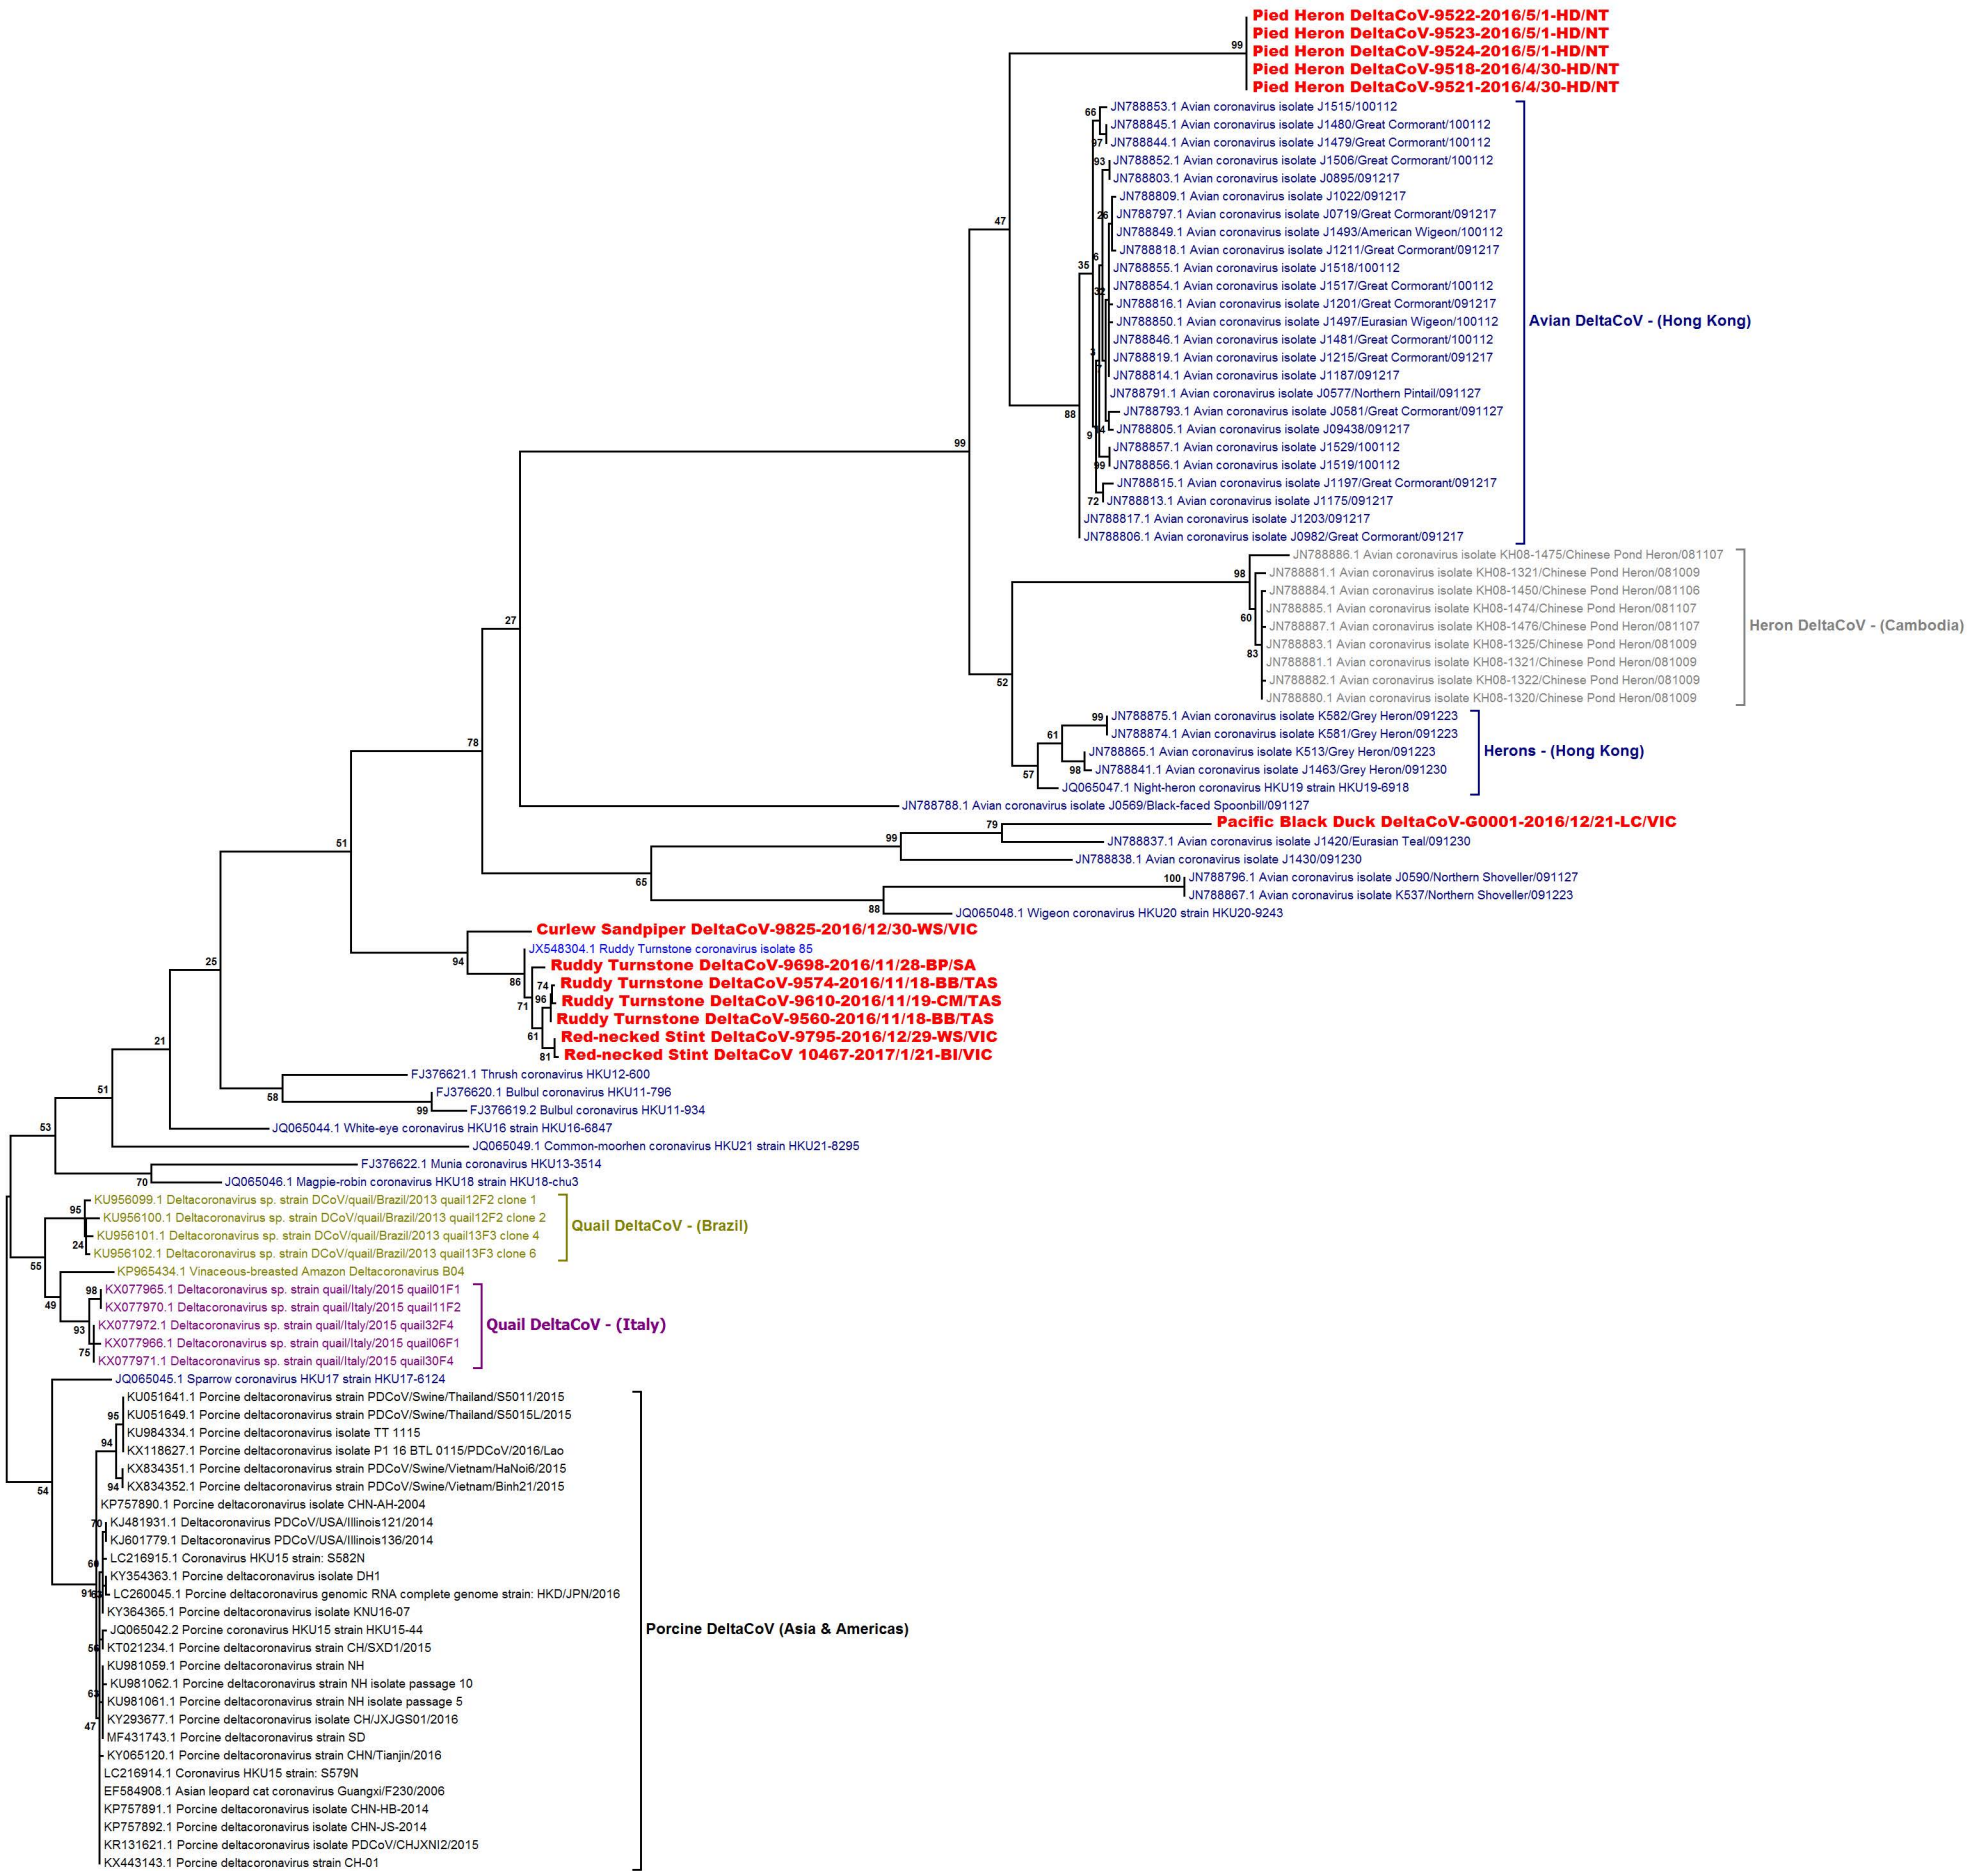

Supplement: 41598_2018_24407_MOESM1_ESM.pdf [file 41598_2018_24407_MOESM1_ESM.pdf]
